# Supplementary material for: Competing valence-related roles of dopamine in the tail of the striatum
Source: Research Square preprint supplement (doi:10.21203/rs.3.rs-7323055/v1), 2025-10-09
Supplement: Supplementary file 1 [file d23966d8326f6cc285e110f0.docx]

**Supplemental information**

**Title**: Competing valence-related roles of dopamine in the tail of the striatum

**Authors**: Ryota Tsuruga, Yu Tajika, Masabumi Minami, Iku Tsutsui-Kimura

**Affiliation**: Department of Pharmacology, Graduate School of Pharmaceutical Sciences, Hokkaido University.

**Lead contact**: Iku Tsutsui-Kimura, ikimura@pharm.hokudai.ac.jp


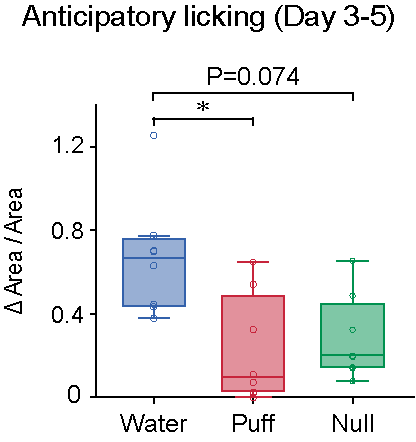


**Figure S1. Increased anticipator licking in the later sessions**

Mice discriminatively showed anticipatory licking in the later sessions of appetitive trials (p=3.0×10-3, F(2, 14)=8.8, repeated ANOVA; p=0.045, aversive vs appetitive, p=0.82, aversive vs null, p=0.074, appetitive vs null, Bonferroni’s test, n=8 animals for each). *p < 0.05.


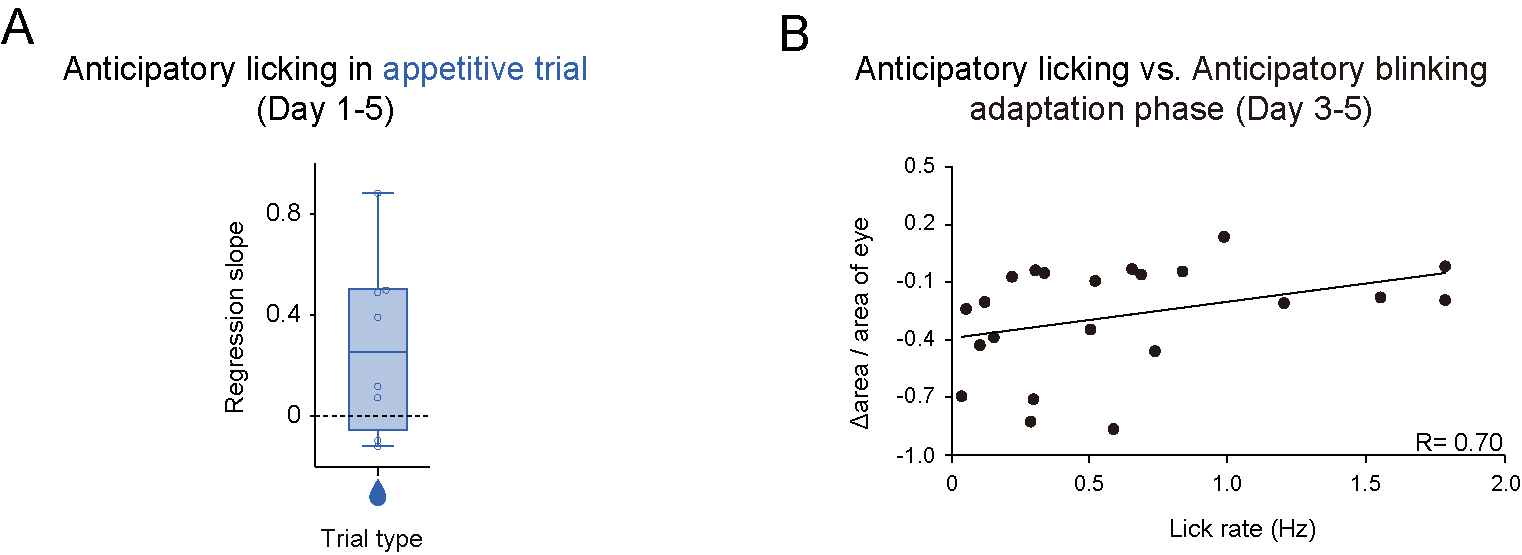


**Figure S2. Two competing valence-induced learning in the 2-VCC task**

**A**, No significant trend in regression coefficients of the rate of anticipatory licking with trial number in Day 1-5 for each animal (p=0.056, one-sampled t-test, n=8). **B**, Regression coefficients of intensities of anticipatory blinking with anticipatory licking were correlated in the adaptation phase (R=0.70, p=0.026, Pearson's correlation coefficient, n=22). Error bars, SEM. Center of box plot shows median; edges are 25th and 75th percentiles; and whiskers are the most extreme data points.


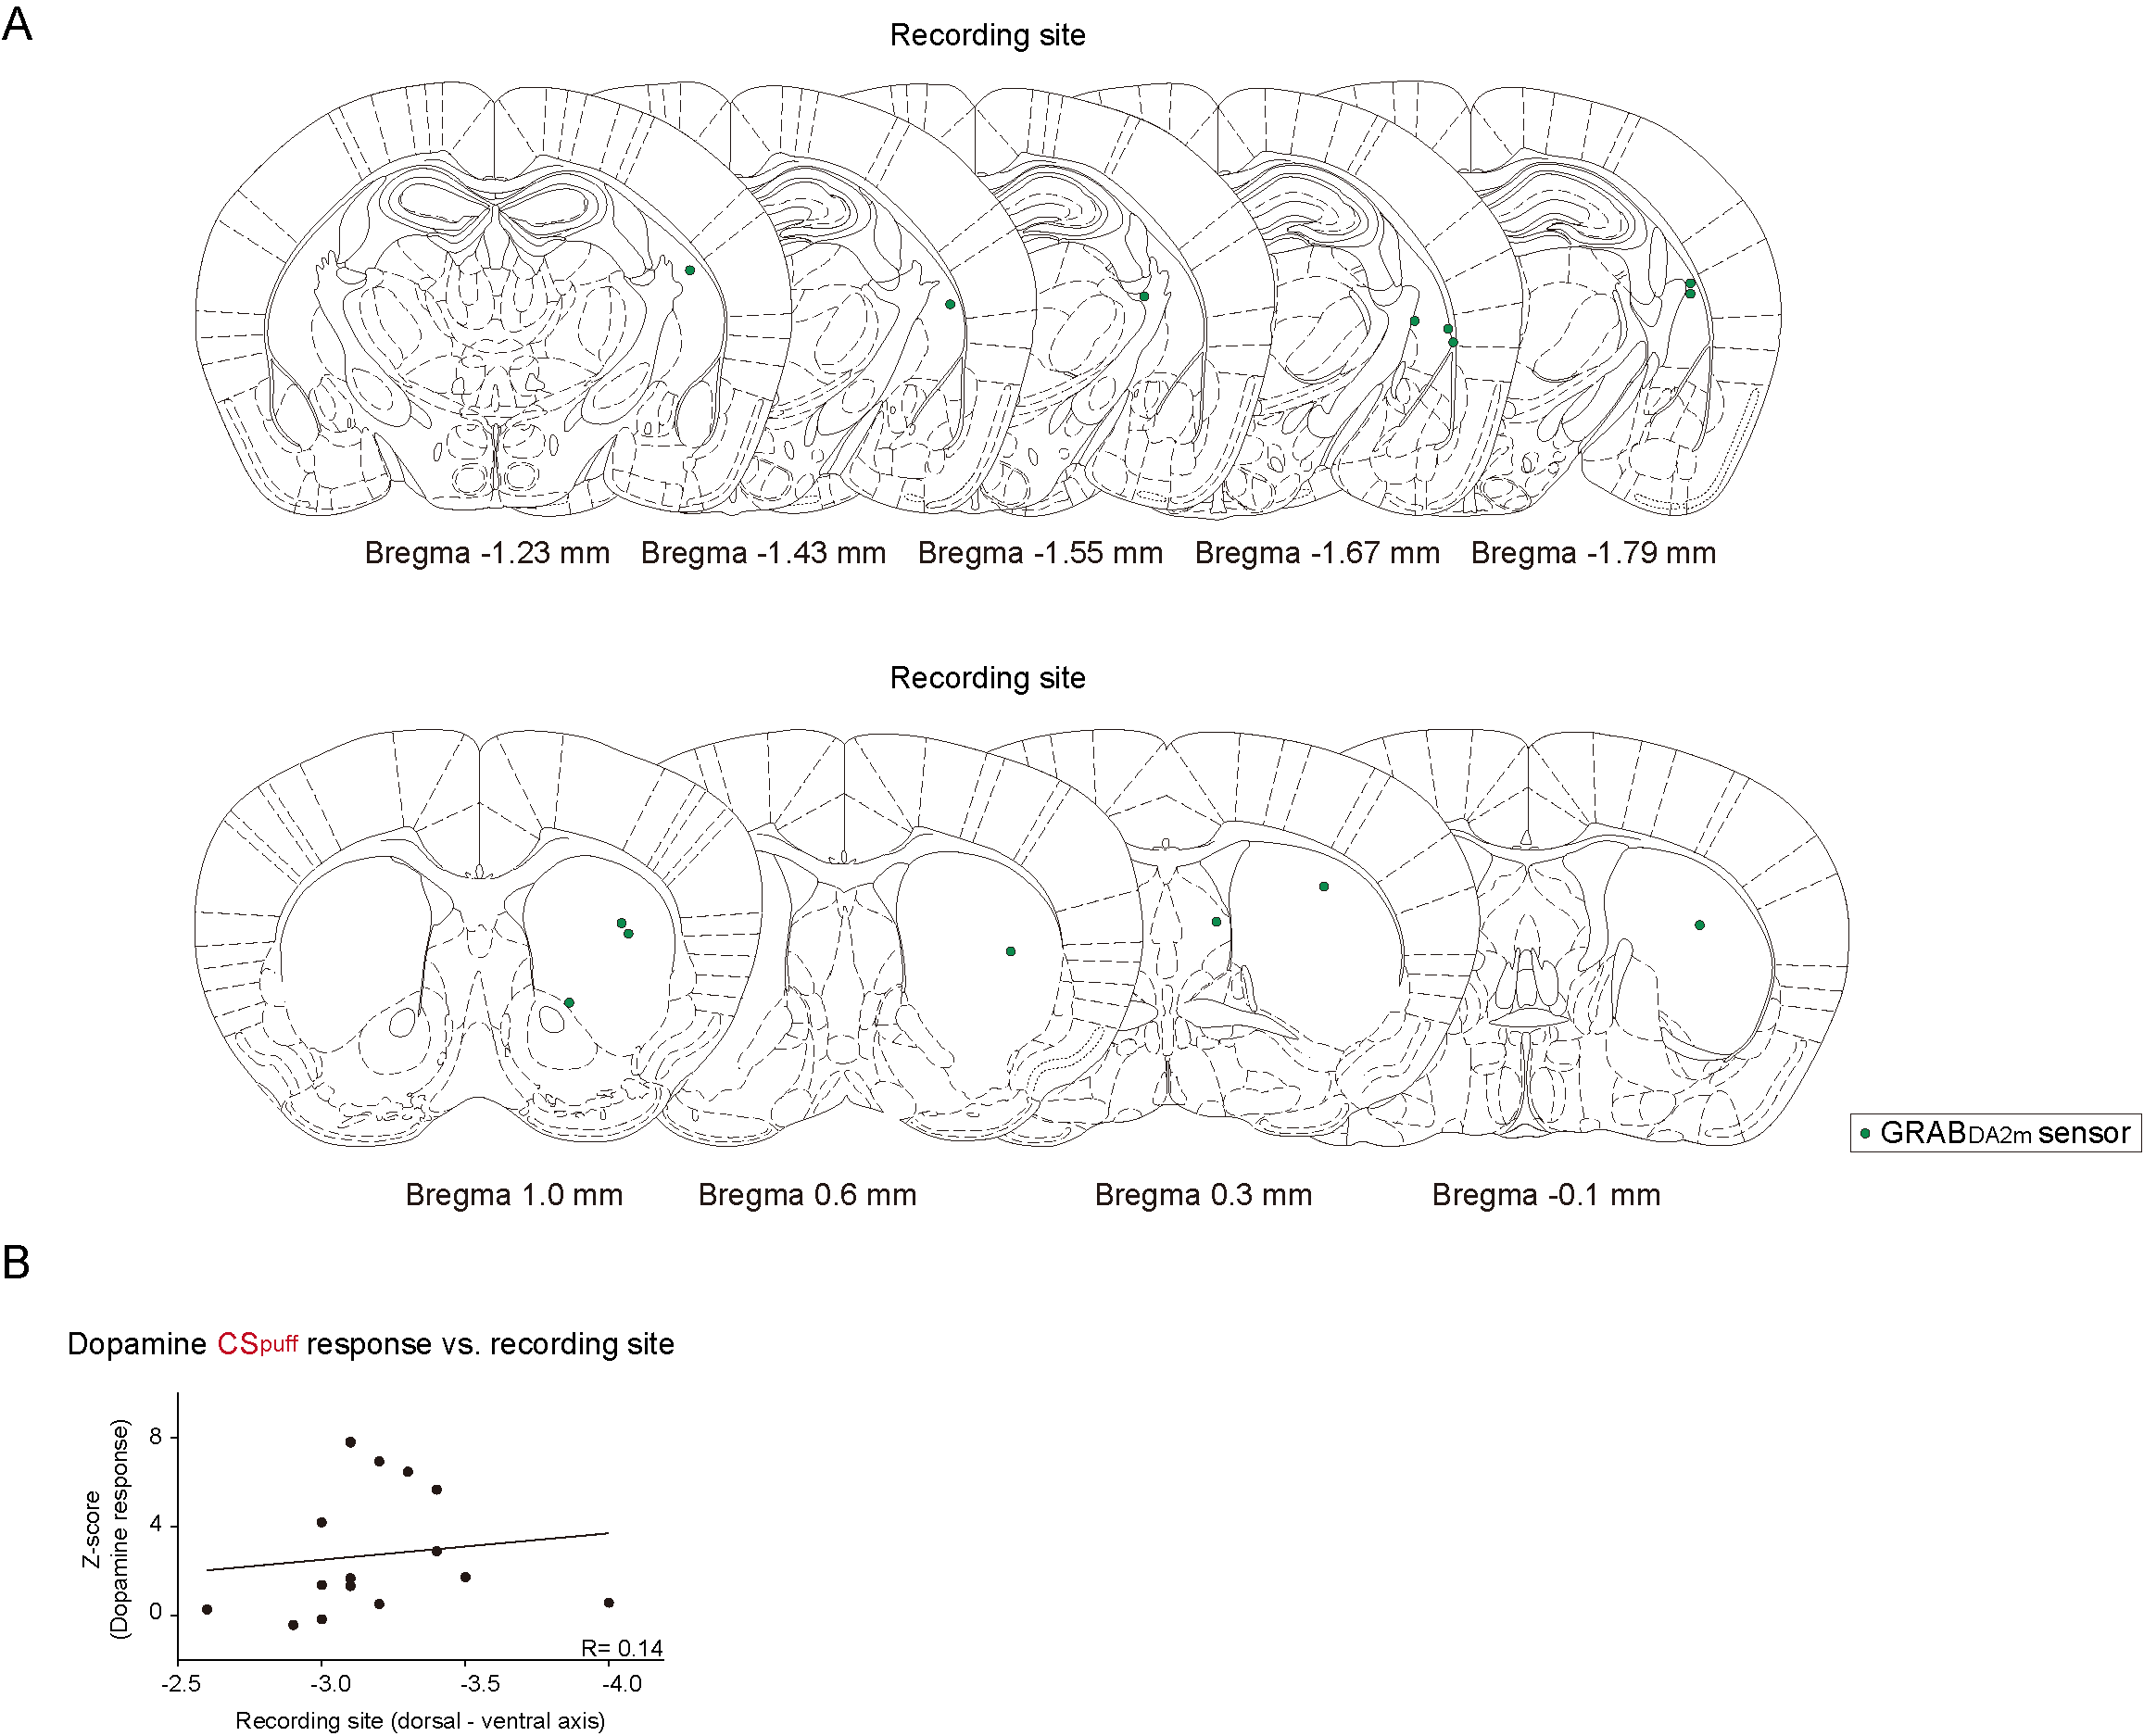


**Figure S3. Striatal dopamine dynamics during the 2-VCC task**

**A**, Location of optic fiber tips (marked with green circles) used to collect dopamine sensor signals in the striatum. **B**, Dopamine CSpuff response was not correlated with dorso-ventral axis of recording location (R=0.14, p=0.63, Pearson's correlation coefficients, n=15 animals).


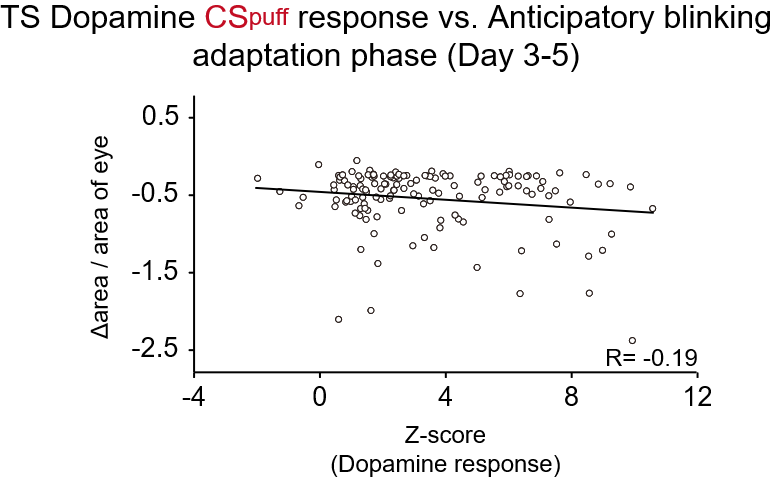


**Figure S4. Correlation between CSpuff response and anticipatory blinking**

Regression coefficients of intensities of anticipatory blinking with amplitude of TS dopamine CSpuff response were anti-correlated (R=-0.19, p=0.025, Pearson's correlation coefficient, n=140).


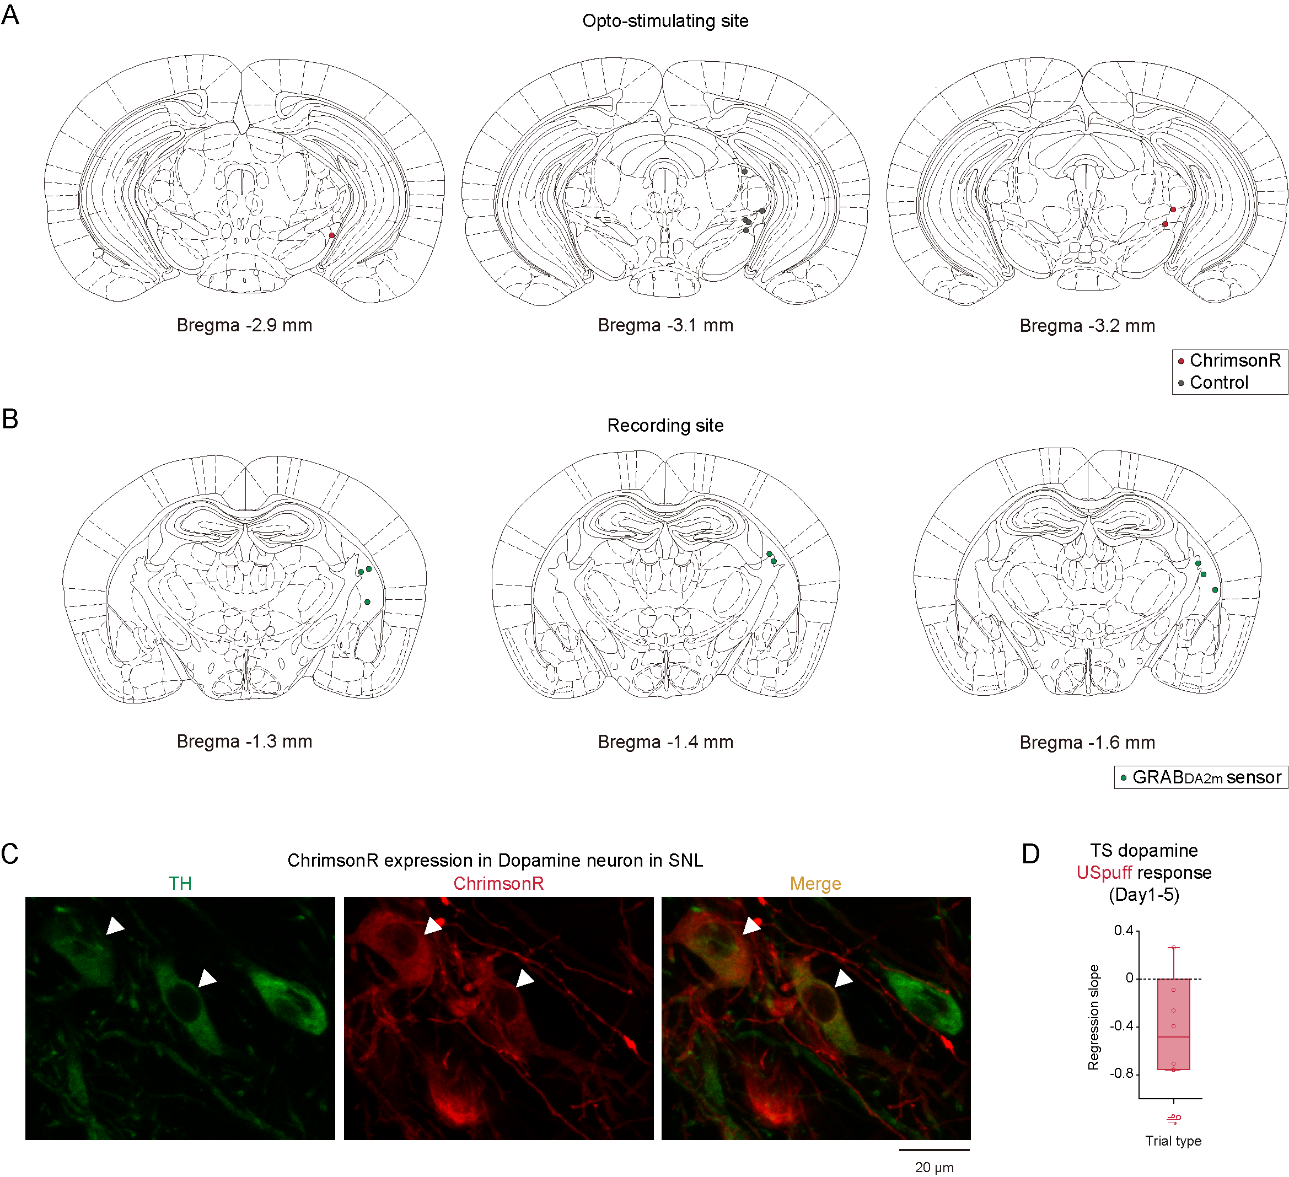


**Figure S5. Validation for optogenetic manipulation of SNL dopamine neurons**

**A,** Location of optic fiber tips (ChrimsonR group was marked with red circles while control group was marked with gray circles) used to opto-stimulate ChrimsonR in the SNL. **B,** Location of optic fiber tips (marked with green circles) used to collect dopamine sensor signals in the striatum. **C,** TH (green) and ChrimsonR (red) expression in DAT-cre mouse. White arrow heads indicate cells that express both. Scale bar, 20 μm. **D**, Regression coefficients of USpuff dopamine response with trial number in Day 1-5 for each animal were not significantly changed (p=0.077, one-sampled t-test, n=6). Error bars, SEM. Center of box plot shows median; edges are 25th and 75th percentiles; and whiskers are the most extreme data points.


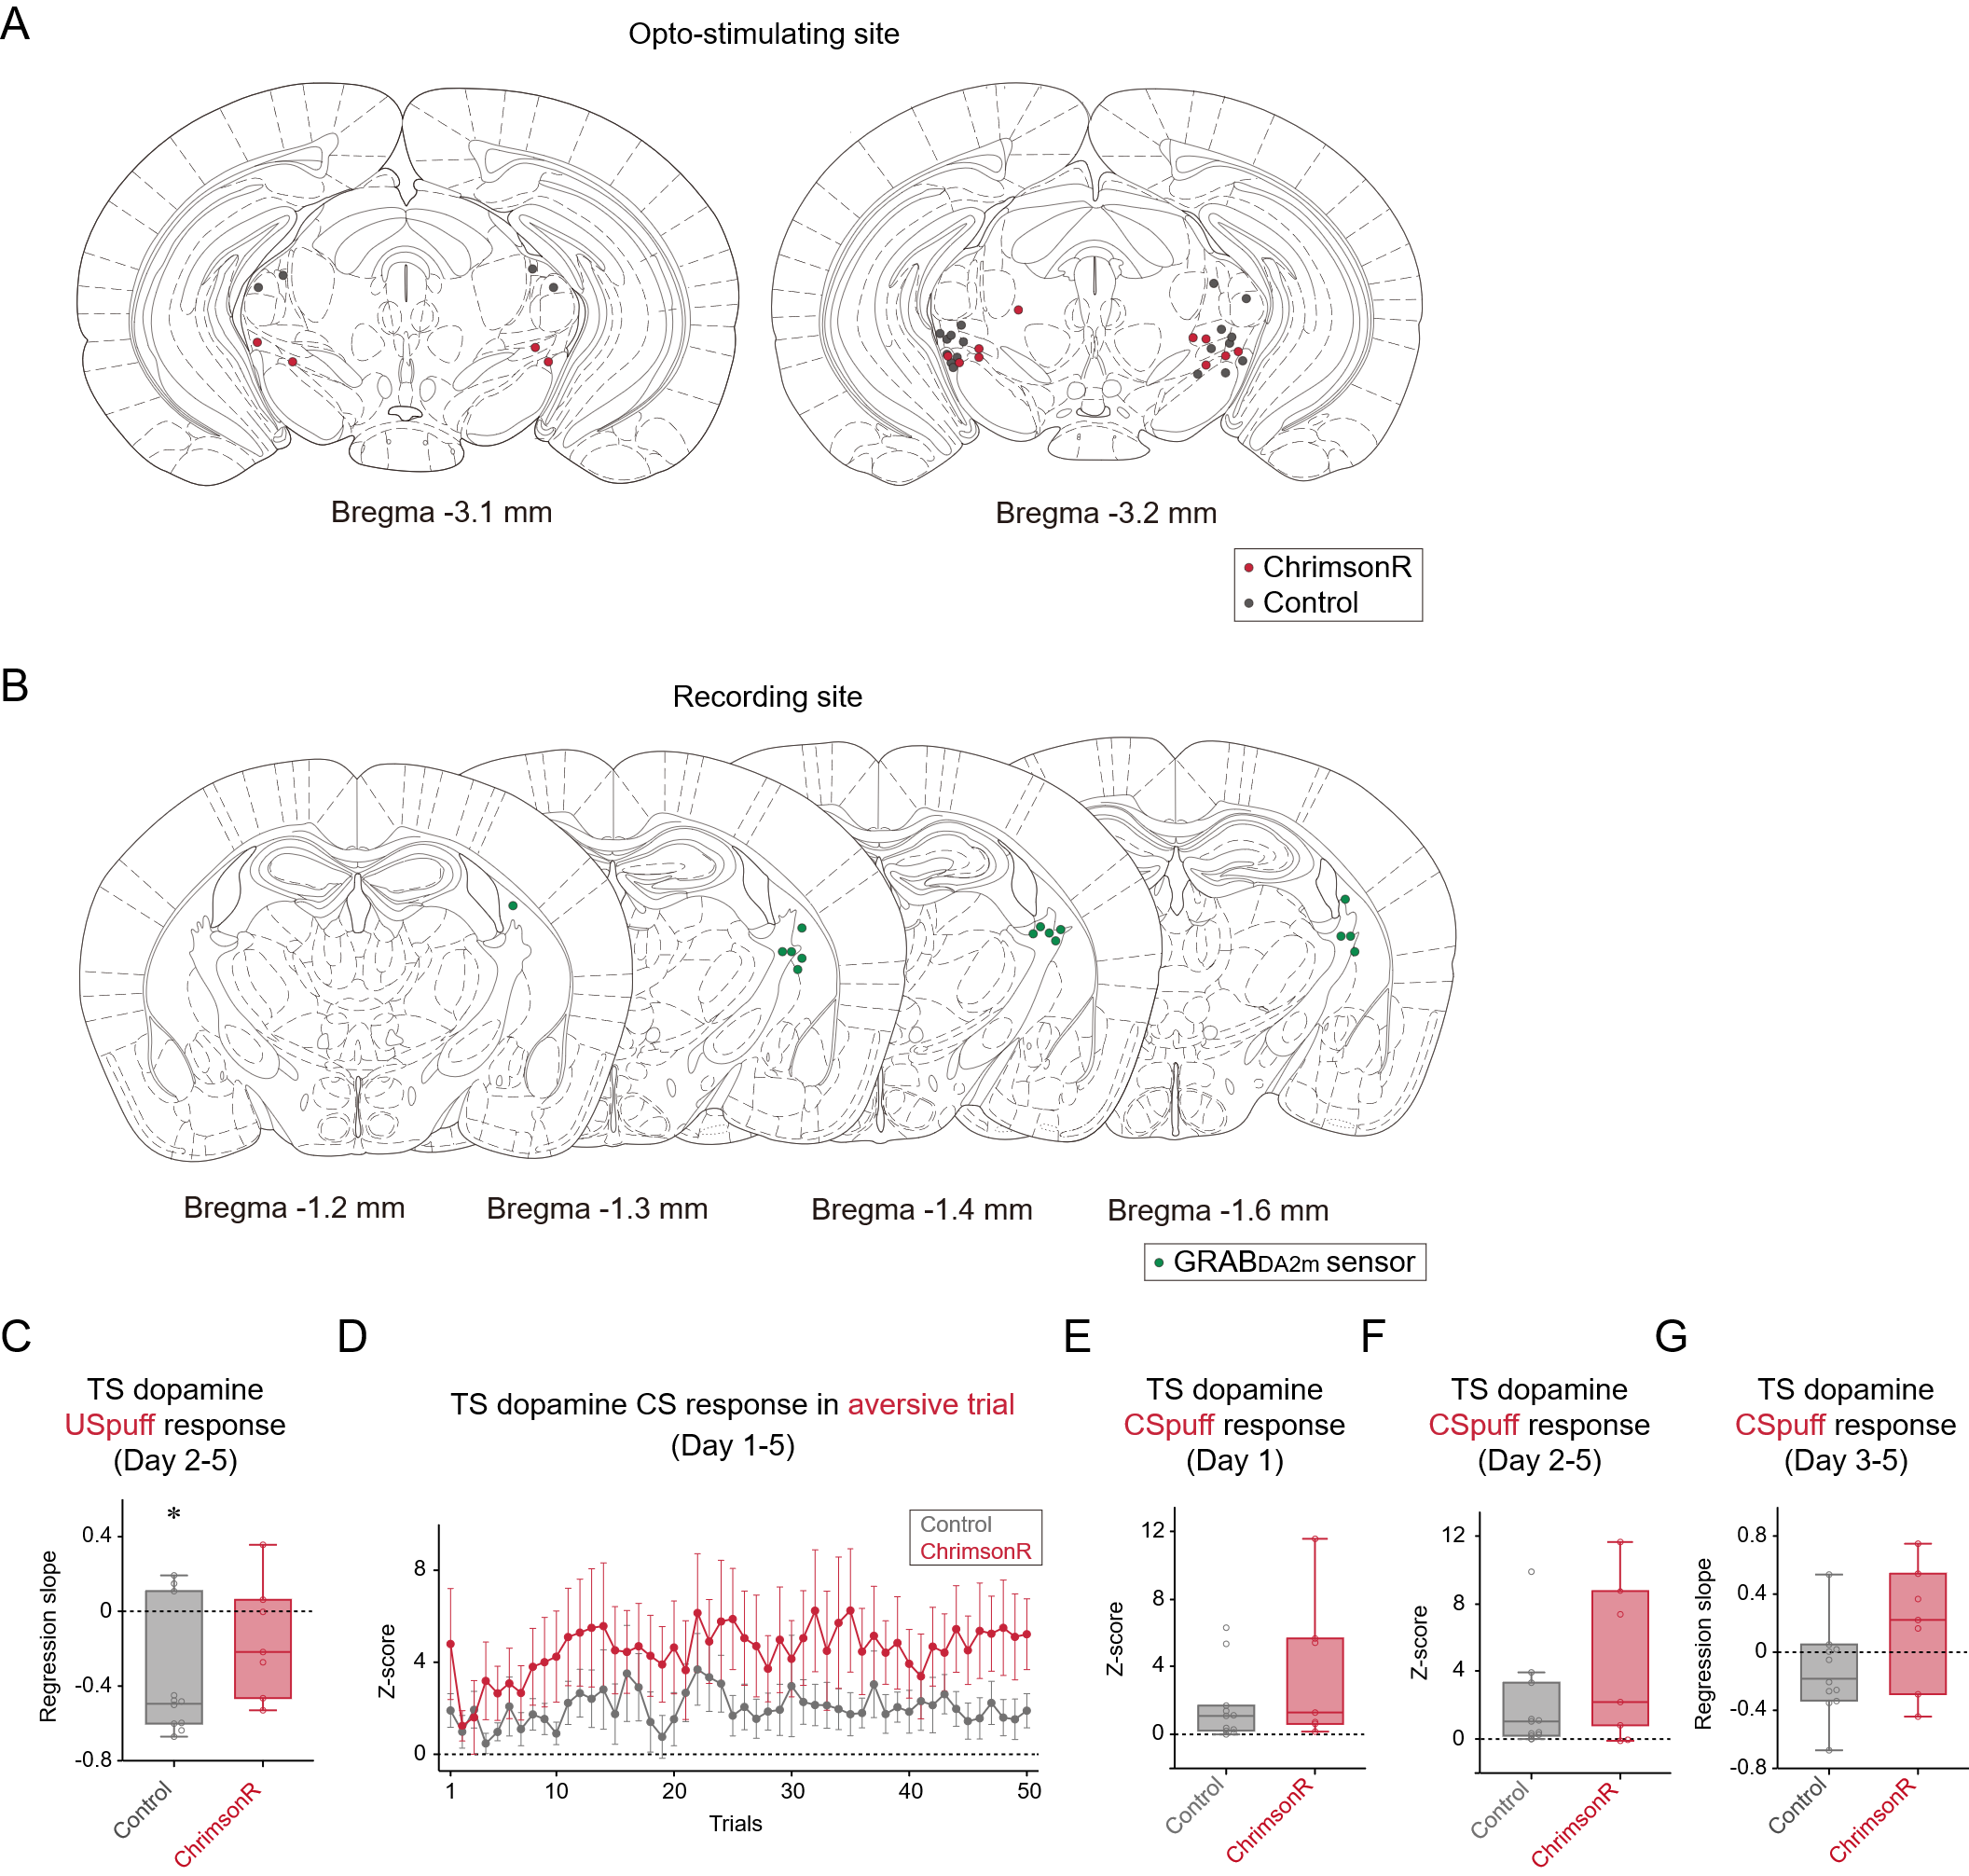


**Figure S6. Optogenetic manipulation affected aversive and appetitive learning**

**A**, Location of optic fiber tips (ChrimsonR group was marked with red circles while control group was marked with gray circles) used to opto-stimulate ChrimsonR in the SNL. **B,** Location of optic fiber tips (marked with green circles) used to collect dopamine sensor signals in the striatum. **C**, Regression coefficients of USpuff dopamine response with trial number in Day 2-5 for each animal were significantly negative in the control (p=5.1×10-3, one-sampled t-test, n=11) but not in ChrimsonR group (p=0.24, one-sampled t-test, n=7). **D**, Time-course of CSpuff dopamine response in the aversive trials. **E**, No difference in CSpuff response in control and ChrimsonR groups in Day 1 (p=0.21, two-sided t-test, control group, n=11, ChrimsonR group, n=7). **F**, CSpuff response was not changed by optogenetic stimulation (p=0.18, two-sided t-test, control group, n=11, ChrimsonR group, n=7). **G**, Regression coefficients of CSpuff dopamine response with trial number in Day 3-5 for each animal were relatively high in the ChrimsonR group (p=0.089, two-sided t-test, control group, n=11, ChrimsonR group, n=7). *p < 0.05.
